# Supplementary material for: A transcriptional constraint mechanism limits the homeostatic response to activity deprivation in mammalian neocortex
Source: eLife journal article supplement (doi:10.7554/elife.74899), 2023-02-07

# DKO\_Survival

Isabel

2/24/2021

pdf\_document: default html\_document: default word\_document: default —

Survival Curve:

```
library(tinytex)
library(tidyverse)
```

```
## -- Attaching packages ----- tidyverse 1.3.0 --
```

```
## v ggplot2 3.3.2      v purrr   0.3.4
## v tibble  3.0.1      v dplyr   1.0.0
## v tidyr   1.1.0      v stringr 1.4.0
## v readr   1.3.1      v forcats 0.5.0
```

```
## -- Conflicts ----- tidyverse_conflicts() --
## x dplyr::filter() masks stats::filter()
## x dplyr::lag()    masks stats::lag()
```

```
library(survival)
colors1=c("red","blue","dark green","purple","black")
survival <- read.csv("C:/Users/isabe/OneDrive/Documents/Nelson Lab/survivalcurve3.csv")
print(survival)
```

| ##    | i.. | time | status | group |
|-------|-----|------|--------|-------|
| ## 1  | 1   | 14   | 1 DBP  | het   |
| ## 2  | 2   | 25   | 1 DBP  | het   |
| ## 3  | 3   | 26   | 1 DBP  | het   |
| ## 4  | 4   | 37   | 1 DBP  | het   |
| ## 5  | 5   | 59   | 1 DBP  | het   |
| ## 6  | 6   | 60   | 1 DBP  | het   |
| ## 7  | 7   | 64   | 1 DBP  | het   |
| ## 8  | 8   | 72   | 1 DBP  | het   |
| ## 9  | 9   | 85   | 1 DBP  | het   |
| ## 10 | 10  | 120  | 1 DBP  | het   |
| ## 11 | 11  | 128  | 1 DBP  | het   |
| ## 12 | 12  | 151  | 1 DBP  | het   |
| ## 13 | 13  | 155  | 1 DBP  | het   |
| ## 14 | 14  | 51   | 0 DBP  | het   |
| ## 15 | 15  | 55   | 0 DBP  | het   |
| ## 16 | 16  | 60   | 0 DBP  | het   |
| ## 17 | 17  | 62   | 0 DBP  | het   |
| ## 18 | 18  | 68   | 0 DBP  | het   |
| ## 19 | 19  | 70   | 0 DBP  | het   |
| ## 20 | 20  | 71   | 0 DBP  | het   |
| ## 21 | 21  | 72   | 0 DBP  | het   |
| ## 22 | 22  | 84   | 0 DBP  | het   |
| ## 23 | 23  | 87   | 0 DBP  | het   |
| ## 24 | 24  | 91   | 0 DBP  | het   |
| ## 25 | 25  | 94   | 0 DBP  | het   |
| ## 26 | 26  | 97   | 0 DBP  | het   |
| ## 27 | 27  | 97   | 0 DBP  | het   |
| ## 28 | 28  | 98   | 0 DBP  | het   |
| ## 29 | 29  | 100  | 0 DBP  | het   |
| ## 30 | 30  | 106  | 0 DBP  | het   |
| ## 31 | 31  | 107  | 0 DBP  | het   |
| ## 32 | 32  | 107  | 0 DBP  | het   |
| ## 33 | 33  | 122  | 0 DBP  | het   |
| ## 34 | 34  | 124  | 0 DBP  | het   |
| ## 35 | 35  | 127  | 0 DBP  | het   |
| ## 36 | 36  | 127  | 0 DBP  | het   |
| ## 37 | 37  | 127  | 0 DBP  | het   |
| ## 38 | 38  | 131  | 0 DBP  | het   |
| ## 39 | 39  | 152  | 0 DBP  | het   |
| ## 40 | 40  | 176  | 0 DBP  | het   |
| ## 41 | 41  | 46   | 0 DBP  | het   |
| ## 42 | 42  | 45   | 0 DBP  | het   |
| ## 43 | 43  | 34   | 0 DBP  | het   |
| ## 44 | 44  | 34   | 0 DBP  | het   |
| ## 45 | 45  | 33   | 0 DBP  | het   |
| ## 46 | 46  | 33   | 0 DBP  | het   |
| ## 47 | 47  | 32   | 0 DBP  | het   |
| ## 48 | 48  | 30   | 0 DBP  | het   |
| ## 49 | 49  | 30   | 0 DBP  | het   |
| ## 50 | 50  | 29   | 0 DBP  | het   |
| ## 51 | 51  | 24   | 0 DBP  | het   |
| ## 52 | 52  | 23   | 0 DBP  | het   |

|        |     |     |   |     |     |
|--------|-----|-----|---|-----|-----|
| ## 53  | 53  | 35  | 0 | DBP | het |
| ## 54  | 54  | 33  | 0 | DBP | het |
| ## 55  | 55  | 33  | 0 | DBP | het |
| ## 56  | 56  | 29  | 0 | DBP | het |
| ## 57  | 57  | 37  | 0 | DBP | het |
| ## 58  | 58  | 37  | 0 | DBP | het |
| ## 59  | 59  | 25  | 0 | DBP | het |
| ## 60  | 196 | 21  | 1 | TKO |     |
| ## 61  | 197 | 24  | 1 | TKO |     |
| ## 62  | 198 | 69  | 1 | TKO |     |
| ## 63  | 199 | 32  | 1 | TKO |     |
| ## 64  | 200 | 20  | 1 | TKO |     |
| ## 65  | 201 | 87  | 1 | TKO |     |
| ## 66  | 202 | 101 | 1 | TKO |     |
| ## 67  | 203 | 20  | 1 | TKO |     |
| ## 68  | 204 | 35  | 1 | TKO |     |
| ## 69  | 205 | 74  | 1 | TKO |     |
| ## 70  | 206 | 28  | 1 | TKO |     |
| ## 71  | 207 | 123 | 1 | TKO |     |
| ## 72  | 208 | 43  | 1 | TKO |     |
| ## 73  | 209 | 134 | 1 | TKO |     |
| ## 74  | 210 | 20  | 1 | TKO |     |
| ## 75  | 211 | 45  | 1 | TKO |     |
| ## 76  | 212 | 23  | 1 | TKO |     |
| ## 77  | 213 | 93  | 1 | TKO |     |
| ## 78  | 214 | 20  | 1 | TKO |     |
| ## 79  | 215 | 20  | 1 | TKO |     |
| ## 80  | 216 | 20  | 1 | TKO |     |
| ## 81  | 217 | 20  | 1 | TKO |     |
| ## 82  | 218 | 98  | 1 | TKO |     |
| ## 83  | 219 | 17  | 1 | TKO |     |
| ## 84  | 220 | 17  | 1 | TKO |     |
| ## 85  | 221 | 23  | 1 | TKO |     |
| ## 86  | 222 | 18  | 1 | TKO |     |
| ## 87  | 223 | 148 | 0 | TKO |     |
| ## 88  | 224 | 70  | 0 | TKO |     |
| ## 89  | 225 | 59  | 0 | TKO |     |
| ## 90  | 226 | 150 | 0 | TKO |     |
| ## 91  | 227 | 93  | 0 | TKO |     |
| ## 92  | 228 | 54  | 0 | TKO |     |
| ## 93  | 229 | 104 | 1 | TKO |     |
| ## 94  | 230 | 82  | 1 | TKO |     |
| ## 95  | 231 | 127 | 1 | TKO |     |
| ## 96  | 232 | 26  | 1 | TKO |     |
| ## 97  | 233 | 26  | 1 | TKO |     |
| ## 98  | 234 | 155 | 0 | TKO |     |
| ## 99  | 235 | 148 | 0 | TKO |     |
| ## 100 | 236 | 43  | 0 | TKO |     |
| ## 101 | 237 | 34  | 0 | TKO |     |
| ## 102 | 238 | 28  | 0 | TKO |     |
| ## 103 | 239 | 18  | 0 | TKO |     |
| ## 104 | 240 | 46  | 0 | TKO |     |
| ## 105 | 241 | 42  | 0 | TKO |     |
| ## 106 | 242 | 40  | 0 | TKO |     |

|        |     |     |       |     |
|--------|-----|-----|-------|-----|
| ## 107 | 243 | 38  | 0     | TKO |
| ## 108 | 244 | 28  | 0     | TKO |
| ## 109 | 245 | 27  | 0     | TKO |
| ## 110 | 246 | 27  | 0     | TKO |
| ## 111 | 247 | 24  | 0     | TKO |
| ## 112 | 248 | 24  | 0     | TKO |
| ## 113 | 249 | 24  | 0     | TKO |
| ## 114 | 250 | 24  | 0     | TKO |
| ## 115 | 251 | 22  | 0     | TKO |
| ## 116 | 252 | 22  | 0     | TKO |
| ## 117 | 253 | 19  | 0     | TKO |
| ## 118 | 254 | 19  | 0     | TKO |
| ## 119 | 255 | 16  | 0     | TKO |
| ## 120 | 256 | 14  | 0     | TKO |
| ## 121 | 257 | 10  | 0     | TKO |
| ## 122 | 258 | 28  | 0     | TKO |
| ## 123 | 259 | 27  | 0     | TKO |
| ## 124 | 260 | 27  | 0     | TKO |
| ## 125 | 261 | 27  | 0     | TKO |
| ## 126 | 262 | 25  | 0     | TKO |
| ## 127 | 263 | 22  | 0     | TKO |
| ## 128 | 264 | 21  | 0     | TKO |
| ## 129 | 265 | 29  | 0     | TKO |
| ## 130 | 266 | 23  | 1 HLF | het |
| ## 131 | 267 | 21  | 1 HLF | het |
| ## 132 | 268 | 92  | 1 HLF | het |
| ## 133 | 269 | 105 | 1 HLF | het |
| ## 134 | 270 | 204 | 0 HLF | het |
| ## 135 | 271 | 198 | 0 HLF | het |
| ## 136 | 272 | 170 | 0 HLF | het |
| ## 137 | 273 | 168 | 0 HLF | het |
| ## 138 | 274 | 154 | 0 HLF | het |
| ## 139 | 275 | 122 | 0 HLF | het |
| ## 140 | 276 | 120 | 0 HLF | het |
| ## 141 | 277 | 66  | 0 HLF | het |
| ## 142 | 278 | 59  | 0 HLF | het |
| ## 143 | 279 | 57  | 0 HLF | het |
| ## 144 | 280 | 55  | 0 HLF | het |
| ## 145 | 281 | 51  | 0 HLF | het |
| ## 146 | 282 | 73  | 0 HLF | het |
| ## 147 | 283 | 199 | 0 HLF | het |
| ## 148 | 284 | 174 | 0 HLF | het |
| ## 149 | 285 | 259 | 0 HLF | het |
| ## 150 | 286 | 194 | 0 HLF | het |
| ## 151 | 287 | 150 | 0 HLF | het |
| ## 152 | 288 | 140 | 0 HLF | het |
| ## 153 | 289 | 189 | 0 HLF | het |
| ## 154 | 290 | 33  | 0 HLF | het |
| ## 155 | 291 | 33  | 0 HLF | het |
| ## 156 | 292 | 26  | 0 HLF | het |
| ## 157 | 293 | 22  | 0 HLF | het |
| ## 158 | 294 | 21  | 0 HLF | het |
| ## 159 | 295 | 21  | 0 HLF | het |
| ## 160 | 296 | 21  | 0 HLF | het |

|    |     |      |     |   |     |     |
|----|-----|------|-----|---|-----|-----|
| ## | 161 | 297  | 16  | 0 | HLF | het |
| ## | 162 | 298  | 15  | 0 | HLF | het |
| ## | 163 | 299  | 15  | 0 | HLF | het |
| ## | 164 | 300  | 28  | 0 | HLF | het |
| ## | 165 | 301  | 19  | 0 | HLF | het |
| ## | 166 | 302  | 86  | 0 |     | WT  |
| ## | 167 | 303  | 86  | 0 |     | WT  |
| ## | 168 | 304  | 80  | 0 |     | WT  |
| ## | 169 | 305  | 80  | 0 |     | WT  |
| ## | 170 | 306  | 80  | 0 |     | WT  |
| ## | 171 | 307  | 80  | 0 |     | WT  |
| ## | 172 | 308  | 102 | 0 |     | WT  |
| ## | 173 | 309  | 102 | 0 |     | WT  |
| ## | 174 | 310  | 200 | 0 |     | WT  |
| ## | 175 | 311  | 45  | 0 |     | WT  |
| ## | 176 | 312  | 45  | 0 |     | WT  |
| ## | 177 | 313  | 45  | 0 |     | WT  |
| ## | 178 | 314  | 136 | 0 |     | WT  |
| ## | 179 | 315  | 136 | 0 |     | WT  |
| ## | 180 | 316  | 23  | 0 |     | WT  |
| ## | 181 | 317  | 21  | 0 |     | WT  |
| ## | 182 | 318  | 21  | 0 |     | WT  |
| ## | 183 | 325  | 161 | 0 |     | TKO |
| ## | 184 | 326  | 129 | 0 |     | TKO |
| ## | 185 | 327  | 23  | 0 |     | TKO |
| ## | 186 | 328  | 23  | 0 |     | TKO |
| ## | 187 | 329  | 23  | 0 |     | TKO |
| ## | 188 | 330  | 23  | 0 |     | TKO |
| ## | 189 | 331  | 23  | 0 |     | TKO |
| ## | 190 | 338  | 74  | 0 |     | TKO |
| ## | 191 | 343  | 129 | 0 |     | TKO |
| ## | 192 | 347  | 45  | 0 |     | WT  |
| ## | 193 | 348  | 45  | 0 |     | WT  |
| ## | 194 | 349  | 45  | 0 |     | WT  |
| ## | 195 | 350  | 136 | 0 |     | WT  |
| ## | 196 | 351  | 136 | 0 |     | WT  |
| ## | 197 | 352  | 27  | 1 |     | TKO |
| ## | 198 | 353  | 27  | 1 |     | TKO |
| ## | 199 | 354  | 19  | 1 |     | TKO |
| ## | 200 | 355  | 20  | 1 |     | TKO |
| ## | 201 | 356  | 21  | 1 |     | TKO |
| ## | 202 | 357  | 25  | 1 |     | TKO |
| ## | 203 | 358  | 25  | 1 |     | TKO |
| ## | 204 | 359  | 17  | 1 |     | TKO |
| ## | 205 | 360  | 18  | 1 |     | TKO |
| ## | 206 | 362  | 22  | 1 |     | TKO |
| ## | 207 | 363  | 27  | 1 |     | TKO |
| ## | 208 | 365  | 158 | 0 |     | TKO |
| ## | 209 | 366  | 190 | 0 |     | TKO |
| ## | 210 | 374  | 40  | 0 |     | TKO |
| ## | 211 | 383  | 154 | 0 |     | TKO |
| ## | 212 | 388  | 63  | 1 |     | TKO |
| ## | 213 | 390  | 94  | 1 |     | TKO |
| ## | 214 | 2169 | 243 | 0 | TEF | het |

|    |     |      |     |   |     |     |
|----|-----|------|-----|---|-----|-----|
| ## | 215 | 2170 | 156 | 0 | TEF | het |
| ## | 216 | 2171 | 137 | 0 | TEF | het |
| ## | 217 | 2172 | 137 | 0 | TEF | het |
| ## | 218 | 2177 | 137 | 0 | TEF | het |
| ## | 219 | 2173 | 78  | 1 | TEF | het |
| ## | 220 | 1729 | 131 | 0 | TEF | het |
| ## | 221 | 1651 | 147 | 0 | TEF | het |
| ## | 222 | 1652 | 133 | 0 | TEF | het |
| ## | 223 | 2351 | 172 | 0 | TEF | het |
| ## | 224 | 2352 | 138 | 0 | TEF | het |
| ## | 225 | 2122 | 104 | 0 | TEF | het |
| ## | 226 | 2038 | 340 | 0 | TEF | het |
| ## | 227 | 2050 | 322 | 0 | TEF | het |
| ## | 228 | 2256 | 228 | 0 | TEF | het |
| ## | 229 | 2255 | 209 | 0 | TEF | het |
| ## | 230 | 2008 | 205 | 0 | TEF | het |
| ## | 231 | 2003 | 186 | 0 | TEF | het |
| ## | 232 | 2010 | 180 | 0 | TEF | het |
| ## | 233 | 2347 | 176 | 0 | TEF | het |
| ## | 234 | 2363 | 174 | 0 | TEF | het |
| ## | 235 | 2044 | 168 | 0 | TEF | het |
| ## | 236 | 2146 | 158 | 0 | TEF | het |
| ## | 237 | 2252 | 158 | 0 | TEF | het |
| ## | 238 | 2252 | 158 | 0 | TEF | het |
| ## | 239 | 2257 | 158 | 0 | TEF | het |
| ## | 240 | 2257 | 158 | 0 | TEF | het |
| ## | 241 | 2362 | 155 | 0 | TEF | het |
| ## | 242 | 1942 | 151 | 0 | TEF | het |
| ## | 243 | 1943 | 151 | 0 | TEF | het |
| ## | 244 | 2161 | 150 | 0 | TEF | het |
| ## | 245 | 2165 | 149 | 0 | TEF | het |
| ## | 246 | 2328 | 144 | 0 | TEF | het |
| ## | 247 | 2053 | 132 | 0 | TEF | het |
| ## | 248 | 1675 | 127 | 0 | TEF | het |
| ## | 249 | 2105 | 122 | 0 | TEF | het |
| ## | 250 | 2365 | 121 | 0 | TEF | het |
| ## | 251 | 2042 | 118 | 0 | TEF | het |
| ## | 252 | 2062 | 116 | 0 | TEF | het |
| ## | 253 | 2369 | 116 | 0 | TEF | het |
| ## | 254 | 2060 | 105 | 0 | TEF | het |
| ## | 255 | 2063 | 102 | 0 | TEF | het |
| ## | 256 | 2064 | 102 | 0 | TEF | het |
| ## | 257 | 2066 | 102 | 0 | TEF | het |
| ## | 258 | 2368 | 101 | 0 | TEF | het |
| ## | 259 | 2086 | 93  | 0 | TEF | het |
| ## | 260 | 2088 | 93  | 0 | TEF | het |
| ## | 261 | 2099 | 85  | 0 | TEF | het |
| ## | 262 | 2115 | 64  | 0 | TEF | het |
| ## | 263 | 2449 | 64  | 0 | TEF | het |
| ## | 264 | 2450 | 64  | 0 | TEF | het |
| ## | 265 | 2451 | 64  | 0 | TEF | het |
| ## | 266 | 2452 | 64  | 0 | TEF | het |
| ## | 267 | 2144 | 51  | 0 | TEF | het |
| ## | 268 | 2372 | 50  | 0 | TEF | het |

|    |     |      |     |   |     |     |
|----|-----|------|-----|---|-----|-----|
| ## | 269 | 1939 | 151 | 1 | TEF | het |
| ## | 270 | 2065 | 49  | 1 | TEF | het |
| ## | 271 | 2159 | 21  | 1 | TEF | het |
| ## | 272 | 2254 | 119 | 1 | TEF | het |
| ## | 273 | 2197 | 232 | 0 | TEF | het |
| ## | 274 | 2166 | 149 | 0 | TEF | het |
| ## | 275 | 2167 | 149 | 0 | TEF | het |
| ## | 276 | 2199 | 147 | 0 | TEF | het |
| ## | 277 | 1668 | 141 | 0 | TEF | het |
| ## | 278 | 2198 | 128 | 0 | TEF | het |
| ## | 279 | 2207 | 128 | 0 | TEF | het |
| ## | 280 | 1928 | 98  | 0 | TEF | het |
| ## | 281 | 1929 | 98  | 0 | TEF | het |
| ## | 282 | 2370 | 50  | 0 | TEF | het |
| ## | 283 | 2371 | 50  | 0 | TEF | het |
| ## | 284 | 2374 | 50  | 0 | TEF | het |
| ## | 285 | 2193 | 69  | 1 | TEF | het |
| ## | 286 | 1898 | 103 | 0 | TEF | het |
| ## | 287 | 1345 | 176 | 0 | TEF | het |
| ## | 288 | 2299 | 223 | 0 | TEF | het |
| ## | 289 | 2277 | 212 | 0 | TEF | het |
| ## | 290 | 2278 | 212 | 0 | TEF | het |
| ## | 291 | 2281 | 194 | 0 | TEF | het |
| ## | 292 | 2279 | 193 | 0 | TEF | het |
| ## | 293 | 2280 | 193 | 0 | TEF | het |
| ## | 294 | 2304 | 192 | 0 | TEF | het |
| ## | 295 | 2298 | 151 | 0 | TEF | het |
| ## | 296 | 2301 | 151 | 0 | TEF | het |
| ## | 297 | 2303 | 151 | 0 | TEF | het |
| ## | 298 | 2443 | 118 | 0 | TEF | het |
| ## | 299 | 2444 | 117 | 0 | TEF | het |
| ## | 300 | 2432 | 111 | 0 | TEF | het |
| ## | 301 | 2433 | 111 | 0 | TEF | het |
| ## | 302 | 2434 | 111 | 0 | TEF | het |
| ## | 303 | 2436 | 98  | 0 | TEF | het |
| ## | 304 | 2437 | 98  | 0 | TEF | het |
| ## | 305 | 2439 | 98  | 0 | TEF | het |
| ## | 306 | 2440 | 98  | 0 | TEF | het |
| ## | 307 | 2446 | 97  | 0 | TEF | het |
| ## | 308 | 2415 | 86  | 0 | TEF | het |
| ## | 309 | 2418 | 85  | 0 | TEF | het |
| ## | 310 | 2419 | 85  | 0 | TEF | het |
| ## | 311 | 2422 | 85  | 0 | TEF | het |
| ## | 312 | 2423 | 85  | 0 | TEF | het |
| ## | 313 | 2471 | 81  | 0 | TEF | het |
| ## | 314 | 2473 | 81  | 0 | TEF | het |
| ## | 315 | 2474 | 81  | 0 | TEF | het |
| ## | 316 | 2475 | 81  | 0 | TEF | het |
| ## | 317 | 2476 | 81  | 0 | TEF | het |
| ## | 318 | 2477 | 81  | 0 | TEF | het |
| ## | 319 | 2478 | 81  | 0 | TEF | het |
| ## | 320 | 2464 | 80  | 0 | TEF | het |
| ## | 321 | 2465 | 80  | 0 | TEF | het |
| ## | 322 | 2467 | 80  | 0 | TEF | het |

|    |     |      |     |   |     |     |
|----|-----|------|-----|---|-----|-----|
| ## | 323 | 2430 | 77  | 0 | TEF | het |
| ## | 324 | 1276 | 66  | 0 | TEF | het |
| ## | 325 | 2442 | 64  | 0 | TEF | het |
| ## | 326 | 2454 | 58  | 0 | TEF | het |
| ## | 327 | 2457 | 58  | 0 | TEF | het |
| ## | 328 | 2459 | 58  | 0 | TEF | het |
| ## | 329 | 1326 | 56  | 0 | TEF | het |
| ## | 330 | 2425 | 19  | 1 | TEF | het |
| ## | 331 | 2445 | 29  | 1 | TEF | het |
| ## | 332 | 1970 | 250 | 0 | TEF | het |
| ## | 333 | 1189 | 232 | 0 | TEF | het |
| ## | 334 | 571  | 227 | 0 | TEF | het |
| ## | 335 | 914  | 211 | 0 | TEF | het |
| ## | 336 | 2685 | 194 | 0 | TEF | het |
| ## | 337 | 660  | 190 | 0 | TEF | het |
| ## | 338 | 771  | 184 | 0 | TEF | het |
| ## | 339 | 873  | 183 | 0 | TEF | het |
| ## | 340 | 685  | 176 | 0 | TEF | het |
| ## | 341 | 685  | 174 | 0 | TEF | het |
| ## | 342 | 874  | 173 | 0 | TEF | het |
| ## | 343 | 833  | 170 | 0 | TEF | het |
| ## | 344 | 780  | 163 | 0 | TEF | het |
| ## | 345 | 806  | 162 | 0 | TEF | het |
| ## | 346 | 2296 | 155 | 0 | TEF | het |
| ## | 347 | 1178 | 154 | 0 | TEF | het |
| ## | 348 | 732  | 152 | 0 | TEF | het |
| ## | 349 | 871  | 151 | 0 | TEF | het |
| ## | 350 | 2378 | 151 | 0 | TEF | het |
| ## | 351 | 1201 | 148 | 0 | TEF | het |
| ## | 352 | 2107 | 148 | 0 | TEF | het |
| ## | 353 | 2108 | 148 | 0 | TEF | het |
| ## | 354 | 2114 | 148 | 0 | TEF | het |
| ## | 355 | 1415 | 147 | 0 | TEF | het |
| ## | 356 | 738  | 146 | 0 | TEF | het |
| ## | 357 | 876  | 141 | 0 | TEF | het |
| ## | 358 | 894  | 137 | 0 | TEF | het |
| ## | 359 | 776  | 136 | 0 | TEF | het |
| ## | 360 | 2383 | 132 | 0 | TEF | het |
| ## | 361 | 2190 | 128 | 0 | TEF | het |
| ## | 362 | 810  | 125 | 0 | TEF | het |
| ## | 363 | 1023 | 120 | 0 | TEF | het |
| ## | 364 | 1606 | 120 | 0 | TEF | het |
| ## | 365 | 2096 | 103 | 0 | TEF | het |
| ## | 366 | 2382 | 101 | 0 | TEF | het |
| ## | 367 | 2384 | 100 | 0 | TEF | het |
| ## | 368 | 1105 | 99  | 0 | TEF | het |
| ## | 369 | 2096 | 98  | 0 | TEF | het |
| ## | 370 | 2192 | 97  | 0 | TEF | het |
| ## | 371 | 2539 | 88  | 0 | TEF | het |
| ## | 372 | 2550 | 88  | 0 | TEF | het |
| ## | 373 | 1168 | 80  | 0 | TEF | het |
| ## | 374 | 1172 | 80  | 0 | TEF | het |
| ## | 375 | 1255 | 72  | 0 | TEF | het |
| ## | 376 | 1272 | 72  | 0 | TEF | het |



```
## 377 2091 70 0 TEF het
## 378 2092 70 0 TEF het
## 379 2094 70 0 TEF het
## 380 2095 70 0 TEF het
## 381 2537 70 0 TEF het
## 382 2540 70 0 TEF het
## 383 1291 66 0 TEF het
## 384 1155 59 0 TEF het
## 385 1327 50 0 TEF het
## 386 2601 50 0 TEF het
## 387 2237 17 1 TEF het
## 388 2218 24 1 TEF het
## 389 2387 18 1 TEF het
## 390 2599 27 1 TEF het
## 391 2728 32 1 TEF het
## 392 1940 158 0 TEF het
```

```
group <- survival$group
time <- survival$time
status <- survival$status
formula1 <- Surv(time, status == 1) ~ group
test_result <- survdiff(formula = formula1, data = survival, rho = 0)
test_result
```

```
## Call:
## survdiff(formula = formula1, data = survival, rho = 0)
##
##           N Observed Expected (O-E)^2/E (O-E)^2/V
## group=DBP het 59      13    10.17    0.790    0.928
## group=HLF het 36       4     6.47    0.942    1.038
## group=TEF het 179     13    42.73   20.689   49.854
## group=TKO    96     45   11.67   95.253  116.317
## group=WT    22      0     3.97    3.966    4.220
##
##  Chisq= 126  on 4 degrees of freedom, p= <2e-16
```

```
plot(survfit(formula1), lty=c(1), col=colors1,xlab = "Age (days)", ylab = "Cum Survival Probability (%)")
legend("right",title="Genotype", legend=c("DBP+/- DKO (n=59)","HLF+/- DKO (n=36)", "TEF+/- DKO (n=179)","TKO (n=96)", "WT (n=22)"),col=colors1, lty=1, cex=0.8)
```

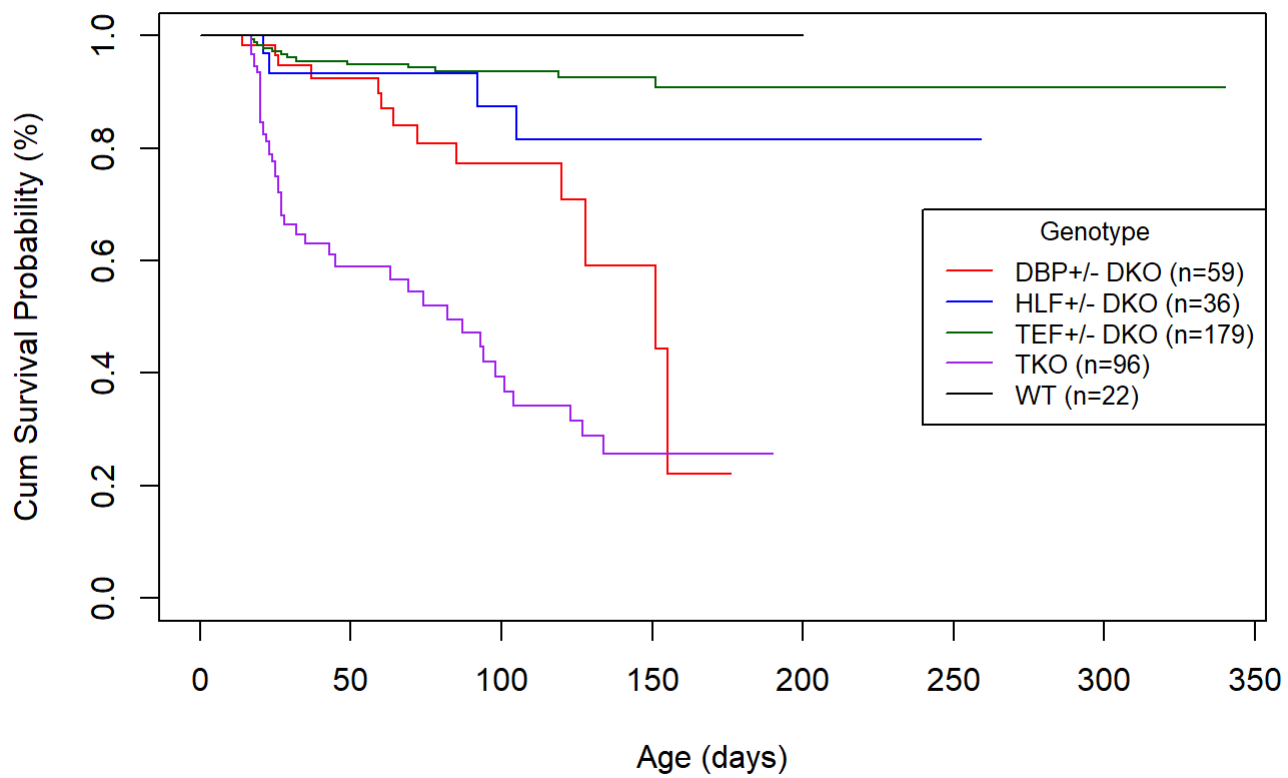

Supplement: supp [file elife-74899-supp-v1.zip]
