# Supplementary material for: A transcriptional constraint mechanism limits the homeostatic response to activity deprivation in mammalian neocortex
Source: eLife. 2023 Feb 7;12:e74899. doi: 10.7554/eLife.74899 (PMC10010687; doi:10.7554/eLife.74899)
Supplement: Figure 1—source data 1. [file elife-74899-fig1-data1.xlsx]

## Sheet: HLF
RPL10
1	1.10573	1.06807	1.63014	0.93627
1	0.98966	1.42899	1.51047	1.67018
1	1.31951	0.69737	1.07177	1.21419
1	1.04248	0.904354	2.28948	0.920162
HLF 5
1	0.99654	2.32141	1.28343	3.16017
1	1.32869	2.09943	2.34567	2.16595
1	2.35381	1.42899	2.32947	2.00694
1	1.52626	1.7593	1.64718	1.60214
HLF 3	1.21419	2.50533	1.91189	3.87716
	1.48452	2.02792	2.45377	2.27363
	1.78386	1.06437	1.53156	1.29235

## Sheet: TEF
TEF
1	3.87716	6.47554	12.6845	12.3377
1	3.20428	4.78991	6.52058	11.7533
1	1.56917	5.22344	2.60268	7.06163
RPL10
1	0.84675	0.70222	1.72309	0.41754
1	1.37554	0.86754	1.42899	0.82074
1	0.49655	0.54337	0.8409	0.6552
